# Supplementary material for: Transcriptome Sequencing Reveals Large-Scale Changes in Axenic Aedes aegypti Larvae
Source: PubMed Central journal article supplement (PMC5245907; doi:10.1371/journal.pntd.0005273), 2017-01-06
Supplement: pntd.0005273.s002.pdf [file pntd.0005273.s002.pdf]

Table S1: Quality filtering statistics of RNAseq reads

| Condition      | Tissue  | Replicate | Raw reads     | Filtered pairs | Total raw reads | Total filtered reads |
|----------------|---------|-----------|---------------|----------------|-----------------|----------------------|
| Axenic         | Carcass | 1         | 14.08         | 5.40           | 50.04           | 20.18                |
|                |         | 2         | 21.08         | 6.55           |                 |                      |
|                |         | 3         | 14.88         | 8.23           |                 |                      |
|                | Gut     | 1         | 13.39         | 9.90           | 38.08           | 22.90                |
|                |         | 2         | 11.94         | 5.89           |                 |                      |
|                |         | 3         | 12.75         | 7.11           |                 |                      |
| Gnotobiotic    | Carcass | 1         | 15.58         | 5.03           | 39.71           | 15.79                |
|                |         | 2         | 10.72         | 6.12           |                 |                      |
|                |         | 3         | 13.41         | 4.64           |                 |                      |
|                | Gut     | 1         | 12.52         | 5.61           | 44.25           | 16.78                |
|                |         | 2         | 16.58         | 5.06           |                 |                      |
|                |         | 3         | 15.15         | 6.11           |                 |                      |
| Conventional   | Carcass | 1         | 166.10        | 9.82           | 130.64          | 7.77                 |
|                |         | 2         | 137.22        | 8.07           |                 |                      |
|                |         | 3         | 88.61         | 5.42           |                 |                      |
|                | Gut     | 1         | 91.92         | 5.73           | 82.90           | 5.26                 |
|                |         | 2         | 71.85         | 4.40           |                 |                      |
|                |         | 3         | 84.92         | 5.65           |                 |                      |
| <b>Average</b> |         |           | <b>45.15</b>  | <b>6.37</b>    | <b>64.27</b>    | <b>14.78</b>         |
| <b>Total</b>   |         |           | <b>812.70</b> | <b>114.73</b>  |                 |                      |

airs
