# Supplementary material for: Transcriptome Sequencing Reveals Large-Scale Changes in Axenic Aedes aegypti Larvae
Source: PubMed Central journal article supplement (PMC5245907; doi:10.1371/journal.pntd.0005273), 2017-01-06
Supplement: pntd.0005273.s003.pdf [file pntd.0005273.s003.pdf]

Table S2: Read mapping statistics

| Tissue  | Treatment    | Replicate | Left  |        |          | Right |        |          | Pairs             |                     |            |            |
|---------|--------------|-----------|-------|--------|----------|-------|--------|----------|-------------------|---------------------|------------|------------|
|         |              |           | Input | Mapped | Multiple | Input | Mapped | Multiple | Aligned pairs (%) | Multiple alignments | Discordant | Concordant |
| Carcass | Axenic       | 1         | 5.84  | 3.94   | 4.53%    | 5.83  | 4.00   | 4.5%     | 3.69 (63.2%)      | 4.5%                | 0.4%       | 63.0%      |
|         |              | 2         | 8.84  | 5.93   | 4.65%    | 8.84  | 6.01   | 4.7%     | 5.55 (62.8%)      | 4.6%                | 0.4%       | 62.5%      |
|         |              | 3         | 6.43  | 4.57   | 4.08%    | 6.43  | 4.62   | 4.1%     | 4.27 (66.5%)      | 4.1%                | 0.4%       | 66.3%      |
|         | Gnotobiotic  | 1         | 6.10  | 4.29   | 4.06%    | 6.09  | 4.35   | 4.1%     | 4.01 (65.8%)      | 4.0%                | 0.4%       | 65.6%      |
|         |              | 2         | 4.33  | 3.09   | 4.16%    | 4.33  | 3.12   | 4.2%     | 2.89 (66.9%)      | 4.2%                | 0.4%       | 66.7%      |
|         |              | 3         | 5.64  | 4.09   | 4.15%    | 5.64  | 4.13   | 4.2%     | 3.84 (68.3%)      | 4.2%                | 0.3%       | 68.0%      |
|         | Conventional | 1         | 4.84  | 3.42   | 8.40%    | 4.84  | 3.42   | 8.4%     | 3.41 (70.6%)      | 8.4%                | 0.0%       | 70.5%      |
|         |              | 2         | 3.98  | 2.81   | 8.60%    | 3.98  | 2.81   | 8.6%     | 2.81 (70.6%)      | 8.6%                | 0.0%       | 70.6%      |
|         |              | 3         | 2.66  | 1.89   | 8.40%    | 2.66  | 1.89   | 8.4%     | 1.89 (8.3%)       | 8.3%                | 0.0%       | 71.2%      |
| Midgut  | Axenic       | 1         | 5.51  | 4.06   | 5.01%    | 5.51  | 4.10   | 5.0%     | 3.77 (68.5%)      | 5.0%                | 0.4%       | 68.3%      |
|         |              | 2         | 5.06  | 3.74   | 4.48%    | 5.06  | 3.78   | 4.5%     | 3.49 (69.%)       | 4.5%                | 0.4%       | 68.8%      |
|         |              | 3         | 5.48  | 4.20   | 4.68%    | 5.48  | 4.24   | 4.7%     | 3.93 (71.8%)      | 4.7%                | 0.5%       | 71.5%      |
|         | Gnotobiotic  | 1         | 5.25  | 4.00   | 5.01%    | 5.25  | 4.03   | 5.0%     | 3.72 (71.%)       | 5.0%                | 0.5%       | 70.7%      |
|         |              | 2         | 6.80  | 5.13   | 4.84%    | 6.80  | 5.17   | 4.8%     | 4.76 (71%)        | 4.9%                | 0.5%       | 69.8%      |
|         |              | 3         | 6.43  | 4.95   | 4.95%    | 6.43  | 4.99   | 4.9%     | 4.62 (72.%)       | 5.0%                | 0.5%       | 71.7%      |
|         | Conventional | 1         | 2.81  | 2.16   | 8.40%    | 2.81  | 2.16   | 8.4%     | 2.16 (76.8%)      | 8.4%                | 0.0%       | 76.8%      |
|         |              | 2         | 2.17  | 1.67   | 8.40%    | 2.17  | 1.67   | 8.4%     | 1.66 (76.8%)      | 8.4%                | 0.0%       | 76.8%      |
|         |              | 3         | 2.74  | 2.05   | 9.70%    | 2.74  | 2.05   | 9.7%     | 2.04 (74.6%)      | 9.7%                | 0.0%       | 74.5%      |
| Average |              |           | 5.1   | 3.7    | 5.92%    | 5.0   | 3.7    | 5.9%     | 3.5 (66.4%)       | 5.9%                | 0.3%       | 69.6%      |
